# Supplementary material for: Applying Carbon Dots to Alleviate Photoinhibition and Boost Early Growth of Soybean Plants
Source: MDPI journal article supplement (doi:10.3390/plants15101446), 2026-05-09
Supplement: s1 [file plants-4196199-supplementary.pdf › plants-4196199-supplementary.pdf]

# Supplementary Materials

## Supplementary Methods: Statistical Analysis (ANOVA)

Figure 3

### F0\_M (morning)

#### Analysis of Variance Table

|           | DF | SS      | MS     | Fc      | Pr>Fc   |
|-----------|----|---------|--------|---------|---------|
| Treatment | 4  | 382.7   | 95.69  | 0.29756 | 0.87755 |
| Residuals | 35 | 11255.3 | 321.58 |         |         |
| Total     | 39 | 11638.0 |        |         |         |

#### Shapiro-Wilk normality test

p-value: 0.04451331

WARNING: at 5% of significance, residuals can not be considered normal!

#### Homogeneity of variances test

p-value: 0.5890488

According to the test of bartlett at 5% of significance, residuals can be considered homocedastic.

According to the F test, the means can not be considered distinct.

|   | Levels     | Means   |
|---|------------|---------|
| 1 | Cdot_0.020 | 173.750 |
| 2 | Cdot_0.050 | 176.125 |
| 3 | Cdot_0.20  | 180.500 |
| 4 | Commercial | 176.000 |
| 5 | Control    | 171.125 |

### F0\_N (Noon)

#### Analysis of Variance Table

|           | DF | SS     | MS     | Fc     | Pr>Fc    |
|-----------|----|--------|--------|--------|----------|
| Treatment | 4  | 30522  | 7630.6 | 2.5841 | 0.053887 |
| Residuals | 35 | 103353 | 2953.0 |        |          |
| Total     | 39 | 133876 |        |        |          |

#### Shapiro-Wilk normality test

p-value: 0.2045864

According to Shapiro-Wilk normality test at 5% of significance, residuals can be considered normal.

#### Homogeneity of variances test

p-value: 0.6851797

According to the test of bartlett at 5% of significance, residuals can be considered homocedastic.

#### Tukey's test

| Groups | Treatments | Means   |
|--------|------------|---------|
| a      | Cdot_0.20  | 298     |
| ab     | Commercial | 274.25  |
| ab     | Control    | 239.125 |
| ab     | Cdot_0.020 | 235.75  |
| b      | Cdot_0.050 | 223.75  |

### Fv/Fm\_M

#### Analysis of Variance Table

|           | DF | SS       | MS        | Fc    | Pr>Fc    |
|-----------|----|----------|-----------|-------|----------|
| Treatment | 4  | 0.058264 | 0.0145661 | 3.249 | 0.022851 |
| Residuals | 35 | 0.156914 | 0.0044833 |       |          |
| Total     | 39 | 0.215178 |           |       |          |

-----  
Shapiro-Wilk normality test

p-value: 0.5303843

According to Shapiro-Wilk normality test at 5% of significance, residuals can be considered normal.

-----  
Homogeneity of variances test

p-value: 0.1982953

According to the test of bartlett at 5% of significance, residuals can be considered homocedastic.

-----  
Tukey's test

-----  
Groups Treatments Means  
a Cdot\_0.050 0.6775125  
a Commercial 0.67675  
ab Cdot\_0.020 0.650625  
ab Cdot\_0.20 0.624  
b Control 0.5755  
-----

**Fv/Fm\_N**

-----  
Analysis of Variance Table

-----  
DF SS MS Fc Pr>Fc  
Treatment 4 0.50683 0.126708 4.3096 0.0061276  
Residuals 35 1.02906 0.029402  
Total 39 1.53589  
-----

Shapiro-Wilk normality test

p-value: 0.2153926

According to Shapiro-Wilk normality test at 5% of significance, residuals can be considered normal.

-----  
Homogeneity of variances test

p-value: 0.8483642

According to the test of bartlett at 5% of significance, residuals can be considered homocedastic.

-----  
Tukey's test

-----  
Groups Treatments Means  
a Control 0.46025  
a Cdot\_0.050 0.43375  
ab Cdot\_0.020 0.393125  
ab Commercial 0.2435  
b Cdot\_0.20 0.17275  
-----

**DP (%)**

-----  
Analysis of Variance Table

-----  
DF SS MS Fc Pr>Fc  
Treatment 4 12624 3155.9 6.055 0.00082139  
Residuals 35 18242 521.2  
Total 39 30866  
-----

Shapiro-Wilk normality test

p-value: 0.264537

According to Shapiro-Wilk normality test at 5% of significance, residuals can be considered normal.

-----  
Homogeneity of variances test

p-value: 0.8605329

According to the test of bartlett at 5% of significance, residuals can be considered homocedastic.

-----  
Tukey's test

-----  
Groups Treatments Means  
a Cdot\_0.20 71.85224  
-----

|    |            |          |
|----|------------|----------|
| ab | Commercial | 60.92252 |
| bc | Cdot_0.050 | 36.87601 |
| bc | Cdot_0.020 | 36.25808 |
| c  | Control    | 23.44241 |

Figure 4

gs\_M

#### Analysis of Variance Table

|           | DF | SS       | MS        | Fc     | Pr>Fc   |
|-----------|----|----------|-----------|--------|---------|
| Treatment | 4  | 0.007506 | 0.0018764 | 1.8398 | 0.14322 |
| Residuals | 35 | 0.035695 | 0.0010199 |        |         |
| Total     | 39 | 0.043201 |           |        |         |

#### Shapiro-Wilk normality test

p-value: 0.08550382

According to Shapiro-Wilk normality test at 5% of significance, residuals can be considered normal.

#### Homogeneity of variances test

p-value: 0.5645312

According to the test of bartlett at 5% of significance, residuals can be considered homocedastic.

According to the F test, the means can not be considered distinct.

| Levels       | Means     |
|--------------|-----------|
| 1 Cdot_0.020 | 0.2065339 |
| 2 Cdot_0.050 | 0.1991848 |
| 3 Cdot_0.20  | 0.1895198 |
| 4 Commercial | 0.2129653 |
| 5 Control    | 0.1739056 |

gs\_N

#### Analysis of Variance Table

|           | DF | SS       | MS         | Fc     | Pr>Fc  |
|-----------|----|----------|------------|--------|--------|
| Treatment | 4  | 0.007527 | 0.00188165 | 2.5939 | 0.0532 |
| Residuals | 35 | 0.025390 | 0.00072542 |        |        |
| Total     | 39 | 0.032916 |            |        |        |

#### Shapiro-Wilk normality test

p-value: 0.8021388

According to Shapiro-Wilk normality test at 5% of significance, residuals can be considered normal.

#### Homogeneity of variances test

p-value: 0.8790252

According to the test of bartlett at 5% of significance, residuals can be considered homocedastic.

#### Tukey's test

| Groups | Treatments | Means     |
|--------|------------|-----------|
| a      | Control    | 0.1849846 |
| ab     | Cdot_0.20  | 0.179608  |
| ab     | Cdot_0.020 | 0.1640926 |
| ab     | Cdot_0.050 | 0.1537111 |
| b      | Commercial | 0.1504378 |

A\_M

#### Analysis of Variance Table

```

-----
              DF      SS      MS      Fc      Pr>Fc
Treatment    4   1.6376 0.40939 0.51312 0.72647
Residuals   35  27.9247 0.79785
Total       39  29.5622
-----

```

Shapiro-Wilk normality test

p-value: 0.2056827

According to Shapiro-Wilk normality test at 5% of significance, residuals can be considered normal.

Homogeneity of variances test

p-value: 0.7663441

According to the test of bartlett at 5% of significance, residuals can be considered homocedastic.

According to the F test, the means can not be considered distinct.

```

-----
      Levels      Means
1 Cdot_0.020 8.403096
2 Cdot_0.050 8.437691
3 Cdot_0.20 8.156814
4 Commercial 8.690943
5 Control 8.145012
-----

```

#### **A\_N**

Analysis of Variance Table

```

-----
              DF      SS      MS      Fc      Pr>Fc
Treatment    4  11.524 2.8809 1.1525 0.34836
Residuals   35  87.491 2.4997
Total       39  99.014
-----

```

Shapiro-Wilk normality test

p-value: 0.7366641

According to Shapiro-Wilk normality test at 5% of significance, residuals can be considered normal.

Homogeneity of variances test

p-value: 0.1172934

According to the test of bartlett at 5% of significance, residuals can be considered homocedastic.

According to the F test, the means can not be considered distinct.

```

-----
      Levels      Means
1 Cdot_0.020 5.883296
2 Cdot_0.050 6.508383
3 Cdot_0.20 6.485602
4 Commercial 5.099633
5 Control 5.603667
-----

```

#### **E\_M**

Analysis of Variance Table

```

-----
              DF      SS      MS      Fc      Pr>Fc
Treatment    4   0.3162 0.079055 0.28539 0.88547
Residuals   35   9.6953 0.277010
Total       39  10.0116
-----

```

Shapiro-Wilk normality test

p-value: 0.7792157

According to Shapiro-Wilk normality test at 5% of significance, residuals can be considered normal.

Homogeneity of variances test

p-value: 0.2079941

According to the test of bartlett at 5% of significance, residuals can be considered homocedastic.

-----  
According to the F test, the means can not be considered distinct.  
-----

|   | Levels     | Means    |
|---|------------|----------|
| 1 | Cdot_0.020 | 4.308508 |
| 2 | Cdot_0.050 | 4.193948 |
| 3 | Cdot_0.20  | 4.100757 |
| 4 | Commercial | 4.207920 |
| 5 | Control    | 4.053468 |

-----

**E\_N**

-----  
Analysis of Variance Table  
-----

|           | DF | SS     | MS     | Fc     | Pr>Fc  |
|-----------|----|--------|--------|--------|--------|
| Treatment | 4  | 10.560 | 2.6399 | 1.4778 | 0.2299 |
| Residuals | 35 | 62.523 | 1.7864 |        |        |
| Total     | 39 | 73.083 |        |        |        |

-----

Shapiro-Wilk normality test

p-value: 0.2763478

According to Shapiro-Wilk normality test at 5% of significance, residuals can be considered normal.  
-----

Homogeneity of variances test

p-value: 0.9661429

According to the test of bartlett at 5% of significance, residuals can be considered homocedastic.  
-----

According to the F test, the means can not be considered distinct.  
-----

|   | Levels     | Means    |
|---|------------|----------|
| 1 | Cdot_0.020 | 8.554985 |
| 2 | Cdot_0.050 | 8.613348 |
| 3 | Cdot_0.20  | 8.689571 |
| 4 | Commercial | 7.802297 |
| 5 | Control    | 9.421430 |

-----

**Ci\_M**

-----  
Analysis of Variance Table  
-----

|           | DF | SS      | MS     | Fc    | Pr>Fc    |
|-----------|----|---------|--------|-------|----------|
| Treatment | 4  | 385.17  | 96.293 | 2.273 | 0.080996 |
| Residuals | 35 | 1482.74 | 42.364 |       |          |
| Total     | 39 | 1867.91 |        |       |          |

-----

Shapiro-Wilk normality test

p-value: 0.9209133

According to Shapiro-Wilk normality test at 5% of significance, residuals can be considered normal.  
-----

Homogeneity of variances test

p-value: 0.09933348

According to the test of bartlett at 5% of significance, residuals can be considered homocedastic.  
-----

Tukey's test  
-----

| Groups | Treatments | Means    |
|--------|------------|----------|
| a      | Commercial | 324.5685 |
| ab     | Cdot_0.050 | 322.2647 |
| ab     | Cdot_0.020 | 321.3999 |
| ab     | Control    | 317.7002 |
| b      | Cdot_0.20  | 316.0406 |

-----

**Ci\_N**

-----  
Analysis of Variance Table  
-----

|  | DF | SS | MS | Fc | Pr>Fc |
|--|----|----|----|----|-------|
|--|----|----|----|----|-------|

```
Treatment  4  691.2 172.795 1.7845 0.15403
Residuals  35 3389.2  96.834
Total      39 4080.4
```

-----  
Shapiro-Wilk normality test

p-value: 0.8136541

According to Shapiro-Wilk normality test at 5% of significance, residuals can be considered normal.

-----  
Homogeneity of variances test

p-value: 0.5820476

According to the test of bartlett at 5% of significance, residuals can be considered homocedastic.

-----  
According to the F test, the means can not be considered distinct.

-----  
          Levels      Means  
1 Cdot\_0.020 293.5383  
2 Cdot\_0.050 290.0312  
3 Cdot\_0.20 301.2354  
4 Commercial 298.3686  
5 Control 299.6440  
-----

**iWUE\_M**

-----  
Analysis of Variance Table

-----  
          DF      SS      MS      Fc     Pr>Fc  
Treatment 4 102.08 25.519 1.7071 0.17049  
Residuals 35 523.22 14.949  
Total 39 625.30  
-----

Shapiro-Wilk normality test

p-value: 0.3228807

According to Shapiro-Wilk normality test at 5% of significance, residuals can be considered normal.

-----  
Homogeneity of variances test

p-value: 0.7723835

According to the test of bartlett at 5% of significance, residuals can be considered homocedastic.

-----  
According to the F test, the means can not be considered distinct.

-----  
          Levels      Means  
1 Cdot\_0.020 40.32426  
2 Cdot\_0.050 41.45411  
3 Cdot\_0.20 41.16652  
4 Commercial 42.56152  
5 Control 44.94695  
-----

**iWUE\_N**

-----  
Analysis of Variance Table

-----  
          DF      SS      MS      Fc     Pr>Fc  
Treatment 4 186.04 46.509 0.96195 0.44053  
Residuals 35 1692.22 48.349  
Total 39 1878.26  
-----

Shapiro-Wilk normality test

p-value: 0.3993942

According to Shapiro-Wilk normality test at 5% of significance, residuals can be considered normal.

-----  
Homogeneity of variances test

p-value: 0.78891

According to the test of bartlett at 5% of significance, residuals can be considered homocedastic.

-----  
According to the F test, the means can not be considered distinct.

```

-----
      Levels      Means
1 Cdot_0.020 39.26300
2 Cdot_0.050 41.76568
3 Cdot_0.20 35.34103
4 Commercial 37.19048
5 Control 37.71711
-----

```

#### k\_M

##### Analysis of Variance Table

```

-----
      DF      SS      MS      Fc      Pr>Fc
Treatment  4 0.0014876 0.00037190 0.45144 0.77063
Residuals 35 0.0288335 0.00082381
Total      39 0.0303211
-----

```

##### Shapiro-Wilk normality test

p-value: 0.1489431

According to Shapiro-Wilk normality test at 5% of significance, residuals can be considered normal.

##### Homogeneity of variances test

p-value: 0.7664136

According to the test of bartlett at 5% of significance, residuals can be considered homocedastic.

According to the F test, the means can not be considered distinct.

```

-----
      Levels      Means
1 Cdot_0.020 0.2797577
2 Cdot_0.050 0.2835567
3 Cdot_0.20 0.2753156
4 Commercial 0.2900600
5 Control 0.2728870
-----

```

#### k\_N

##### Analysis of Variance Table

```

-----
      DF      SS      MS      Fc      Pr>Fc
Treatment  4 0.015156 0.0037890 0.97028 0.43611
Residuals 35 0.136677 0.0039051
Total      39 0.151833
-----

```

##### Shapiro-Wilk normality test

p-value: 0.581577

According to Shapiro-Wilk normality test at 5% of significance, residuals can be considered normal.

##### Homogeneity of variances test

p-value: 0.1042814

According to the test of bartlett at 5% of significance, residuals can be considered homocedastic.

According to the F test, the means can not be considered distinct.

```

-----
      Levels      Means
1 Cdot_0.020 0.2150798
2 Cdot_0.050 0.2439063
3 Cdot_0.20 0.2335423
4 Commercial 0.1866137
5 Control 0.2208691
-----

```

## Figure 5

#### F0\_M

##### Analysis of Variance Table

```

-----
          DF      SS      MS      Fc      Pr>Fc
Treatment  4  352.25  88.062  1.6703  0.17889
Residuals 35 1845.25  52.721
Total      39 2197.50
-----

```

Shapiro-Wilk normality test

p-value: 0.3121579

According to Shapiro-Wilk normality test at 5% of significance, residuals can be considered normal.

Homogeneity of variances test

p-value: 0.5886705

According to the test of bartlett at 5% of significance, residuals can be considered homocedastic.

According to the F test, the means can not be considered distinct.

```

-----
          Levels      Means
1  Cdot_0.020  152.250
2  Cdot_0.050  144.625
3   Cdot_0.20  146.875
4 Commercial  151.250
5   Control   146.250
-----

```

#### F0\_N

Analysis of Variance Table

```

-----
          DF      SS      MS      Fc      Pr>Fc
Treatment  4  2752.8  688.19  2.9863  0.031986
Residuals 35  8065.6  230.45
Total      39 10818.4
-----

```

Shapiro-Wilk normality test

p-value: 0.1732055

According to Shapiro-Wilk normality test at 5% of significance, residuals can be considered normal.

Homogeneity of variances test

p-value: 0.1839541

According to the test of bartlett at 5% of significance, residuals can be considered homocedastic.

Tukey's test

```

-----
Groups Treatments Means
a      Control      200.125
ab     Cdot_0.020   191.375
ab     Commercial   190.25
ab     Cdot_0.20    181.25
b      Cdot_0.050   176.375
-----

```

#### Fv/Fm\_M

Analysis of Variance Table

```

-----
          DF      SS      MS      Fc      Pr>Fc
Treatment  4  0.0001563  3.9087e-05  0.14114  0.96572
Residuals 35  0.0096933  2.7695e-04
Total      39  0.0098496
-----

```

Shapiro-Wilk normality test

p-value: 0.4794896

According to Shapiro-Wilk normality test at 5% of significance, residuals can be considered normal.

Homogeneity of variances test

p-value: 0.1946604

According to the test of bartlett at 5% of significance, residuals can be considered homocedastic.



-----  
According to the F test, the means can not be considered distinct.  
-----

|   | Levels     | Means    |
|---|------------|----------|
| 1 | Cdot_0.020 | 0.735125 |
| 2 | Cdot_0.050 | 0.736625 |
| 3 | Cdot_0.20  | 0.734250 |
| 4 | Commercial | 0.730750 |
| 5 | Control    | 0.735250 |

-----

**Fv/Fm N**

-----

Analysis of Variance Table

-----

|            | DF | SS       | MS        | Fc     | Pr>Fc   |
|------------|----|----------|-----------|--------|---------|
| Treatament | 4  | 0.026179 | 0.0065448 | 1.5687 | 0.20429 |
| Residuals  | 35 | 0.146025 | 0.0041722 |        |         |
| Total      | 39 | 0.172204 |           |        |         |

-----

Shapiro-Wilk normality test

p-value: 0.1634663

According to Shapiro-Wilk normality test at 5% of significance, residuals can be considered normal.

-----

Homogeneity of variances test

p-value: 0.1998993

According to the test of bartlett at 5% of significance, residuals can be considered homocedastic.

-----

According to the F test, the means can not be considered distinct.

-----

|   | Levels     | Means    |
|---|------------|----------|
| 1 | Cdot_0.020 | 0.601250 |
| 2 | Cdot_0.050 | 0.647625 |
| 3 | Cdot_0.20  | 0.632250 |
| 4 | Commercial | 0.588750 |
| 5 | Control    | 0.581125 |

-----

**DP (%)**

-----

Analysis of Variance Table

-----

|            | DF | SS     | MS     | Fc      | Pr>Fc   |
|------------|----|--------|--------|---------|---------|
| Treatament | 4  | 312.8  | 78.197 | 0.94241 | 0.45102 |
| Residuals  | 35 | 2904.1 | 82.975 |         |         |
| Total      | 39 | 3216.9 |        |         |         |

-----

Shapiro-Wilk normality test

p-value: 0.2680898

According to Shapiro-Wilk normality test at 5% of significance, residuals can be considered normal.

-----

Homogeneity of variances test

p-value: 0.4837237

According to the test of bartlett at 5% of significance, residuals can be considered homocedastic.

-----

According to the F test, the means can not be considered distinct.

-----

|   | Levels     | Means    |
|---|------------|----------|
| 1 | Cdot_0.020 | 21.40131 |
| 2 | Cdot_0.050 | 14.11574 |
| 3 | Cdot_0.20  | 16.07007 |
| 4 | Commercial | 19.92566 |
| 5 | Control    | 20.39530 |

-----

=====

Figure 6

=====

**F0\_M**

-----

# Analysis of Variance Table

|           | DF | SS      | MS     | Fc     | Pr>Fc   |
|-----------|----|---------|--------|--------|---------|
| Treatment | 4  | 260.35  | 65.087 | 1.6512 | 0.18342 |
| Residuals | 35 | 1379.63 | 39.418 |        |         |
| Total     | 39 | 1639.98 |        |        |         |

Shapiro-Wilk normality test

p-value: 0.5710049

According to Shapiro-Wilk normality test at 5% of significance, residuals can be considered normal.

Homogeneity of variances test

p-value: 0.2047757

According to the test of bartlett at 5% of significance, residuals can be considered homocedastic.

According to the F test, the means can not be considered distinct.

|   | Levels     | Means   |
|---|------------|---------|
| 1 | Cdot_0.020 | 128.375 |
| 2 | Cdot_0.050 | 133.250 |
| 3 | Cdot_0.20  | 136.125 |
| 4 | Commercial | 133.250 |
| 5 | Control    | 131.375 |

## F0\_N

# Analysis of Variance Table

|           | DF | SS      | MS      | Fc     | Pr>Fc    |
|-----------|----|---------|---------|--------|----------|
| Treatment | 4  | 6451.8  | 1612.94 | 2.9199 | 0.034844 |
| Residuals | 35 | 19333.6 | 552.39  |        |          |
| Total     | 39 | 25785.4 |         |        |          |

Shapiro-Wilk normality test

p-value: 0.9091635

According to Shapiro-Wilk normality test at 5% of significance, residuals can be considered normal.

Homogeneity of variances test

p-value: 0.3573561

According to the test of bartlett at 5% of significance, residuals can be considered homocedastic.

Tukey's test

| Groups | Treatments | Means   |
|--------|------------|---------|
| a      | Cdot_0.050 | 226.5   |
| ab     | Cdot_0.20  | 219.125 |
| ab     | Cdot_0.020 | 218.875 |
| b      | Commercial | 196.375 |
| b      | Control    | 196     |

## Fv/Fm\_M

# Analysis of Variance Table

|           | DF | SS        | MS         | Fc      | Pr>Fc   |
|-----------|----|-----------|------------|---------|---------|
| Treatment | 4  | 0.0005849 | 0.00014622 | 0.92316 | 0.46156 |
| Residuals | 35 | 0.0055439 | 0.00015840 |         |         |
| Total     | 39 | 0.0061288 |            |         |         |

Shapiro-Wilk normality test

p-value: 0.3016384

According to Shapiro-Wilk normality test at 5% of significance, residuals can be considered normal.

Homogeneity of variances test

p-value: 0.6270034

According to the test of bartlett at 5% of significance, residuals can be considered homocedastic.

According to the F test, the means can not be considered distinct.

|   | Levels     | Means    |
|---|------------|----------|
| 1 | Cdot_0.020 | 0.754000 |
| 2 | Cdot_0.050 | 0.761750 |
| 3 | Cdot_0.20  | 0.759000 |
| 4 | Commercial | 0.751125 |
| 5 | Control    | 0.758750 |

**Fv/Fm\_N**

Analysis of Variance Table

|            | DF | SS      | MS       | Fc    | Pr>Fc   |
|------------|----|---------|----------|-------|---------|
| Treatament | 4  | 0.05559 | 0.013898 | 1.312 | 0.28464 |
| Residuals  | 35 | 0.37075 | 0.010593 |       |         |
| Total      | 39 | 0.42635 |          |       |         |

Shapiro-Wilk normality test

p-value: 0.3782517

According to Shapiro-Wilk normality test at 5% of significance, residuals can be considered normal.

Homogeneity of variances test

p-value: 0.5829474

According to the test of bartlett at 5% of significance, residuals can be considered homocedastic.

According to the F test, the means can not be considered distinct.

|   | Levels     | Means    |
|---|------------|----------|
| 1 | Cdot_0.020 | 0.379625 |
| 2 | Cdot_0.050 | 0.409750 |
| 3 | Cdot_0.20  | 0.393875 |
| 4 | Commercial | 0.474375 |
| 5 | Control    | 0.460500 |

**DP (%)**

Analysis of Variance Table

|            | DF | SS     | MS     | Fc     | Pr>Fc   |
|------------|----|--------|--------|--------|---------|
| Treatament | 4  | 1092.7 | 273.17 | 1.4399 | 0.24145 |
| Residuals  | 35 | 6639.8 | 189.71 |        |         |
| Total      | 39 | 7732.4 |        |        |         |

Shapiro-Wilk normality test

p-value: 0.2853159

According to Shapiro-Wilk normality test at 5% of significance, residuals can be considered normal.

Homogeneity of variances test

p-value: 0.5478745

According to the test of bartlett at 5% of significance, residuals can be considered homocedastic.

According to the F test, the means can not be considered distinct.

|   | Levels     | Means    |
|---|------------|----------|
| 1 | Cdot_0.020 | 49.52306 |
| 2 | Cdot_0.050 | 46.28070 |
| 3 | Cdot_0.20  | 47.23029 |
| 4 | Commercial | 36.56716 |
| 5 | Control    | 37.96863 |

Figure 7

# CCI

## Analysis of Variance Table

|           | DF | SS      | MS      | Fc    | Pr>Fc      |
|-----------|----|---------|---------|-------|------------|
| Treatment | 4  | 82.974  | 20.7436 | 7.257 | 0.00022949 |
| Residuals | 35 | 100.045 | 2.8584  |       |            |
| Total     | 39 | 183.019 |         |       |            |

## Shapiro-Wilk normality test

p-value: 0.5457402

According to Shapiro-Wilk normality test at 5% of significance, residuals can be considered normal.

## Homogeneity of variances test

p-value: 0.9596198

According to the test of bartlett at 5% of significance, residuals can be considered homocedastic.

## Tukey's test

| Groups | Treatments | Means    |
|--------|------------|----------|
| a      | Cdot_0.050 | 31.38333 |
| ab     | Cdot_0.20  | 29.43542 |
| ab     | Cdot_0.020 | 29.37708 |
| b      | Commercial | 27.7125  |
| b      | Control    | 27.35208 |

## Figure 8

### gs\_M

## Analysis of Variance Table

|           | DF | SS       | MS        | Fc      | Pr>Fc  |
|-----------|----|----------|-----------|---------|--------|
| Treatment | 4  | 0.010089 | 0.0025223 | 0.79656 | 0.5387 |
| Residuals | 25 | 0.079162 | 0.0031665 |         |        |
| Total     | 29 | 0.089251 |           |         |        |

## Shapiro-Wilk normality test

p-value: 0.9367457

According to Shapiro-Wilk normality test at 5% of significance, residuals can be considered normal.

## Homogeneity of variances test

p-value: 0.7638018

According to the test of bartlett at 5% of significance, residuals can be considered homocedastic.

According to the F test, the means can not be considered distinct.

| Levels       | Means     |
|--------------|-----------|
| 1 Cdot_0.020 | 0.1637026 |
| 2 Cdot_0.050 | 0.1564261 |
| 3 Cdot_0.20  | 0.2038258 |
| 4 Commercial | 0.1799201 |
| 5 Control    | 0.1971090 |

### gs\_N

## Analysis of Variance Table

|           | DF | SS       | MS        | Fc     | Pr>Fc    |
|-----------|----|----------|-----------|--------|----------|
| Treatment | 4  | 0.021811 | 0.0054527 | 2.3183 | 0.084917 |
| Residuals | 25 | 0.058801 | 0.0023520 |        |          |
| Total     | 29 | 0.080612 |           |        |          |

## Shapiro-Wilk normality test

p-value: 0.9803

According to Shapiro-Wilk normality test at 5% of significance, residuals can be considered normal.

-----  
Homogeneity of variances test

p-value: 0.2764214

According to the test of bartlett at 5% of significance, residuals can be considered homocedastic.

-----  
Tukey's test

-----  
Groups Treatments Means

|    |            |            |
|----|------------|------------|
| a  | Cdot_0.20  | 0.1362127  |
| ab | Cdot_0.020 | 0.1205924  |
| ab | Control    | 0.1045238  |
| ab | Commercial | 0.09202741 |
| b  | Cdot_0.050 | 0.05713149 |

-----

**A\_M**

-----  
Analysis of Variance Table

|            | DF | SS      | MS     | Fc     | Pr>Fc   |
|------------|----|---------|--------|--------|---------|
| Treatament | 4  | 26.824  | 6.7060 | 1.1045 | 0.37631 |
| Residuals  | 25 | 151.782 | 6.0713 |        |         |
| Total      | 29 | 178.605 |        |        |         |

-----

Shapiro-Wilk normality test

p-value: 0.6365746

According to Shapiro-Wilk normality test at 5% of significance, residuals can be considered normal.

-----  
Homogeneity of variances test

p-value: 0.3007103

According to the test of bartlett at 5% of significance, residuals can be considered homocedastic.

-----  
According to the F test, the means can not be considered distinct.

|   | Levels     | Means     |
|---|------------|-----------|
| 1 | Cdot_0.020 | 8.698784  |
| 2 | Cdot_0.050 | 8.788266  |
| 3 | Cdot_0.20  | 11.205191 |
| 4 | Commercial | 10.072059 |
| 5 | Control    | 9.151112  |

-----

**A\_N**

-----  
Analysis of Variance Table

|            | DF | SS     | MS     | Fc     | Pr>Fc   |
|------------|----|--------|--------|--------|---------|
| Treatament | 4  | 102.48 | 25.621 | 2.0717 | 0.11479 |
| Residuals  | 25 | 309.18 | 12.367 |        |         |
| Total      | 29 | 411.66 |        |        |         |

-----

Shapiro-Wilk normality test

p-value: 0.6127021

According to Shapiro-Wilk normality test at 5% of significance, residuals can be considered normal.

-----  
Homogeneity of variances test

p-value: 0.2913407

According to the test of bartlett at 5% of significance, residuals can be considered homocedastic.

-----  
According to the F test, the means can not be considered distinct.

|   | Levels     | Means    |
|---|------------|----------|
| 1 | Cdot_0.020 | 7.144741 |
| 2 | Cdot_0.050 | 3.906627 |
| 3 | Cdot_0.20  | 8.768858 |
| 4 | Commercial | 5.834350 |

5 Control 8.753048

-----  
**E\_M**  
-----

Analysis of Variance Table  
-----

|           | DF | SS      | MS      | Fc     | Pr>Fc   |
|-----------|----|---------|---------|--------|---------|
| Treatment | 4  | 2.7772  | 0.69429 | 1.0125 | 0.41984 |
| Residuals | 25 | 17.1425 | 0.68570 |        |         |
| Total     | 29 | 19.9197 |         |        |         |

-----

Shapiro-Wilk normality test

p-value: 0.5440581

According to Shapiro-Wilk normality test at 5% of significance, residuals can be considered normal.

-----  
Homogeneity of variances test

p-value: 0.4081609

According to the test of bartlett at 5% of significance, residuals can be considered homocedastic.

-----  
According to the F test, the means can not be considered distinct.  
-----

|   | Levels     | Means    |
|---|------------|----------|
| 1 | Cdot_0.020 | 2.311611 |
| 2 | Cdot_0.050 | 2.602134 |
| 3 | Cdot_0.20  | 3.196825 |
| 4 | Commercial | 2.855326 |
| 5 | Control    | 2.960439 |

-----

-----  
**E\_N**  
-----

Analysis of Variance Table  
-----

|           | DF | SS      | MS      | Fc     | Pr>Fc    |
|-----------|----|---------|---------|--------|----------|
| Treatment | 4  | 43.753  | 10.9383 | 2.1873 | 0.099621 |
| Residuals | 25 | 125.018 | 5.0007  |        |          |
| Total     | 29 | 168.772 |         |        |          |

-----

Shapiro-Wilk normality test

p-value: 0.2173463

According to Shapiro-Wilk normality test at 5% of significance, residuals can be considered normal.

-----  
Homogeneity of variances test

p-value: 0.4938048

According to the test of bartlett at 5% of significance, residuals can be considered homocedastic.

-----  
Tukey's test  
-----

| Groups | Treatments | Means    |
|--------|------------|----------|
| a      | Cdot_0.20  | 7.434029 |
| ab     | Cdot_0.020 | 7.117624 |
| ab     | Control    | 6.456422 |
| ab     | Commercial | 6.010252 |
| b      | Cdot_0.050 | 4.003251 |

-----

-----  
**Ci\_M**  
-----

Analysis of Variance Table  
-----

|           | DF | SS     | MS     | Fc      | Pr>Fc   |
|-----------|----|--------|--------|---------|---------|
| Treatment | 4  | 786.9  | 196.73 | 0.71488 | 0.58964 |
| Residuals | 25 | 6879.9 | 275.20 |         |         |
| Total     | 29 | 7666.9 |        |         |         |

-----

Shapiro-Wilk normality test

p-value: 0.3738691

According to Shapiro-Wilk normality test at 5% of significance, residuals can be considered normal.

-----  
Homogeneity of variances test

p-value: 0.09406023

According to the test of bartlett at 5% of significance, residuals can be considered homocedastic.

-----  
According to the F test, the means can not be considered distinct.

-----  
          Levels      Means  
1 Cdot\_0.020 313.2950  
2 Cdot\_0.050 307.7243  
3 Cdot\_0.20 305.2203  
4 Commercial 316.2369  
5 Control 318.9039  
-----

-----  
**Ci\_N**  
-----

Analysis of Variance Table

-----  
          DF      SS      MS      Fc     Pr>Fc  
Treatment 4 1162.4 290.60 0.56992 0.68685  
Residuals 25 12747.2 509.89  
Total 29 13909.6  
-----

Shapiro-Wilk normality test

p-value: 0.2018963

According to Shapiro-Wilk normality test at 5% of significance, residuals can be considered normal.

-----  
Homogeneity of variances test

p-value: 0.755731

According to the test of bartlett at 5% of significance, residuals can be considered homocedastic.

-----  
According to the F test, the means can not be considered distinct.

-----  
          Levels      Means  
1 Cdot\_0.020 256.4406  
2 Cdot\_0.050 250.2116  
3 Cdot\_0.20 246.4368  
4 Commercial 251.5124  
5 Control 237.8034  
-----

-----  
**iWUE\_M**  
-----

Analysis of Variance Table

-----  
          DF      SS      MS      Fc     Pr>Fc  
Treatment 4 276.51 69.127 0.77658 0.55087  
Residuals 25 2225.35 89.014  
Total 29 2501.86  
-----

Shapiro-Wilk normality test

p-value: 0.3362932

According to Shapiro-Wilk normality test at 5% of significance, residuals can be considered normal.

-----  
Homogeneity of variances test

p-value: 0.2260242

According to the test of bartlett at 5% of significance, residuals can be considered homocedastic.

-----  
According to the F test, the means can not be considered distinct.

-----  
          Levels      Means  
1 Cdot\_0.020 55.01301  
2 Cdot\_0.050 57.37083  
3 Cdot\_0.20 57.36259  
4 Commercial 51.23933  
-----

5 Control 50.12516

-----  
**iWUE\_N**  
-----

Analysis of Variance Table  
-----

|           | DF | SS     | MS     | Fc      | Pr>Fc   |
|-----------|----|--------|--------|---------|---------|
| Treatment | 4  | 522.3  | 130.58 | 0.61456 | 0.65613 |
| Residuals | 25 | 5312.0 | 212.48 |         |         |
| Total     | 29 | 5834.3 |        |         |         |

  
-----

Shapiro-Wilk normality test

p-value: 0.3071235

According to Shapiro-Wilk normality test at 5% of significance, residuals can be considered normal.

-----  
Homogeneity of variances test

p-value: 0.5835244

According to the test of bartlett at 5% of significance, residuals can be considered homocedastic.

-----  
According to the F test, the means can not be considered distinct.  
-----

|   | Levels     | Means    |
|---|------------|----------|
| 1 | Cdot_0.020 | 57.92045 |
| 2 | Cdot_0.050 | 62.21173 |
| 3 | Cdot_0.20  | 65.45877 |
| 4 | Commercial | 60.74663 |
| 5 | Control    | 70.06406 |

  
-----

-----  
**k\_M**  
-----

Analysis of Variance Table  
-----

|           | DF | SS       | MS        | Fc     | Pr>Fc   |
|-----------|----|----------|-----------|--------|---------|
| Treatment | 4  | 0.051039 | 0.0127597 | 1.3019 | 0.29632 |
| Residuals | 25 | 0.245013 | 0.0098005 |        |         |
| Total     | 29 | 0.296052 |           |        |         |

  
-----

Shapiro-Wilk normality test

p-value: 0.338616

According to Shapiro-Wilk normality test at 5% of significance, residuals can be considered normal.

-----  
Homogeneity of variances test

p-value: 0.2425474

According to the test of bartlett at 5% of significance, residuals can be considered homocedastic.

-----  
According to the F test, the means can not be considered distinct.  
-----

|   | Levels     | Means     |
|---|------------|-----------|
| 1 | Cdot_0.020 | 0.2976152 |
| 2 | Cdot_0.050 | 0.3061547 |
| 3 | Cdot_0.20  | 0.3983130 |
| 4 | Commercial | 0.3765483 |
| 5 | Control    | 0.3784793 |

  
-----

-----  
**k\_N**  
-----

Analysis of Variance Table  
-----

|           | DF | SS      | MS       | Fc     | Pr>Fc   |
|-----------|----|---------|----------|--------|---------|
| Treatment | 4  | 0.17834 | 0.044586 | 1.5169 | 0.22756 |
| Residuals | 25 | 0.73480 | 0.029392 |        |         |
| Total     | 29 | 0.91315 |          |        |         |

  
-----

Shapiro-Wilk normality test

p-value: 0.3323736

According to Shapiro-Wilk normality test at 5% of significance, residuals can be considered normal.



```
-----
Homogeneity of variances test
p-value: 0.3753498
According to the test of bartlett at 5% of significance, residuals can be considered
homocedastic.
-----
```

```
-----
According to the F test, the means can not be considered distinct.
-----
```

```
-----
      Levels      Means
1 Cdot_0.020 0.3157641
2 Cdot_0.050 0.1529597
3 Cdot_0.20 0.3906251
4 Commercial 0.2792400
5 Control 0.2985033
-----
```

Figure 9

#### NAR

```
-----
Analysis of Variance Table
-----
```

|            | DF | SS      | MS        | Fc     | Pr>Fc    |
|------------|----|---------|-----------|--------|----------|
| Treatament | 4  | 0.11833 | 0.0295832 | 3.3203 | 0.020871 |
| Residuals  | 35 | 0.31184 | 0.0089098 |        |          |
| Total      | 39 | 0.43018 |           |        |          |

```
-----
```

```
Shapiro-Wilk normality test
p-value: 0.9023702
According to Shapiro-Wilk normality test at 5% of significance, residuals can be
considered normal.
-----
```

```
Homogeneity of variances test
p-value: 0.4058372
According to the test of bartlett at 5% of significance, residuals can be considered
homocedastic.
-----
```

```
Tukey's test
-----
```

| Groups | Treatments | Means     |
|--------|------------|-----------|
| a      | Cdot_0.050 | 0.6458548 |
| ab     | Cdot_0.020 | 0.6248444 |
| ab     | Commercial | 0.5551068 |
| ab     | Cdot_0.20  | 0.534834  |
| b      | Control    | 0.5021475 |

```
-----
```

#### RGR\_S

```
-----
Analysis of Variance Table
-----
```

|            | DF | SS     | MS     | Fc    | Pr>Fc     |
|------------|----|--------|--------|-------|-----------|
| Treatament | 4  | 2467.3 | 616.81 | 5.743 | 0.0011598 |
| Residuals  | 35 | 3759.1 | 107.40 |       |           |
| Total      | 39 | 6226.3 |        |       |           |

```
-----
```

```
Shapiro-Wilk normality test
p-value: 0.6260762
According to Shapiro-Wilk normality test at 5% of significance, residuals can be
considered normal.
-----
```

```
Homogeneity of variances test
p-value: 0.3790997
According to the test of bartlett at 5% of significance, residuals can be considered
homocedastic.
-----
```

```
Tukey's test
-----
```

| Groups | Treatments | Means    |
|--------|------------|----------|
| a      | Cdot_0.050 | 116.221  |
| ab     | Cdot_0.020 | 114.7888 |
| abc    | Commercial | 105.0022 |

|    |           |          |
|----|-----------|----------|
| bc | Cdot_0.20 | 100.0181 |
| c  | Control   | 96.45276 |

# RGR\_R

## Analysis of Variance Table

|           | DF | SS     | MS     | Fc     | Pr>Fc    |
|-----------|----|--------|--------|--------|----------|
| Treatment | 4  | 1853.3 | 463.34 | 3.8578 | 0.010643 |
| Residuals | 35 | 4203.6 | 120.10 |        |          |
| Total     | 39 | 6057.0 |        |        |          |

## Shapiro-Wilk normality test

p-value: 0.3040365

According to Shapiro-Wilk normality test at 5% of significance, residuals can be considered normal.

## Homogeneity of variances test

p-value: 0.4374286

According to the test of bartlett at 5% of significance, residuals can be considered homocedastic.

## Tukey's test

| Groups | Treatments | Means    |
|--------|------------|----------|
| a      | Cdot_0.050 | 150.9028 |
| a      | Cdot_0.020 | 149.2275 |
| ab     | Commercial | 145.0035 |
| ab     | Cdot_0.20  | 137.4451 |
| b      | Control    | 133.2179 |

# Table 1

## SL

## Analysis of Variance Table

|           | DF | SS     | MS      | Fc     | Pr>Fc     |
|-----------|----|--------|---------|--------|-----------|
| Treatment | 4  | 1152.5 | 288.117 | 4.8667 | 0.0031585 |
| Residuals | 35 | 2072.0 | 59.201  |        |           |
| Total     | 39 | 3224.5 |         |        |           |

## Shapiro-Wilk normality test

p-value: 0.07679964

According to Shapiro-Wilk normality test at 5% of significance, residuals can be considered normal.

## Homogeneity of variances test

p-value: 0.5052267

According to the test of bartlett at 5% of significance, residuals can be considered homocedastic.

## Tukey's test

| Groups | Treatments | Means   |
|--------|------------|---------|
| a      | Cdot_0.050 | 66.7375 |
| ab     | Cdot_0.020 | 60.3125 |
| b      | Cdot_0.20  | 54.1625 |
| b      | Control    | 53.25   |
| b      | Commercial | 52.85   |

## RL

## Analysis of Variance Table

|           | DF | SS    | MS     | Fc     | Pr>Fc  |
|-----------|----|-------|--------|--------|--------|
| Treatment | 4  | 117.4 | 29.349 | 1.6167 | 0.1919 |
| Residuals | 35 | 635.4 | 18.154 |        |        |
| Total     | 39 | 752.8 |        |        |        |

Shapiro-Wilk normality test

p-value: 0.2898883

According to Shapiro-Wilk normality test at 5% of significance, residuals can be considered normal.

Homogeneity of variances test

p-value: 0.07372724

According to the test of bartlett at 5% of significance, residuals can be considered homocedastic.

According to the F test, the means can not be considered distinct.

|   | Levels     | Means   |
|---|------------|---------|
| 1 | Cdot_0.020 | 24.4500 |
| 2 | Cdot_0.050 | 22.0125 |
| 3 | Cdot_0.20  | 21.6000 |
| 4 | Commercial | 21.3625 |
| 5 | Control    | 19.0750 |

#### LA

Analysis of Variance Table

|           | DF | SS    | MS     | Fc    | Pr>Fc    |
|-----------|----|-------|--------|-------|----------|
| Treatment | 4  | 21389 | 5347.2 | 3.655 | 0.013694 |
| Residuals | 35 | 51205 | 1463.0 |       |          |
| Total     | 39 | 72594 |        |       |          |

Shapiro-Wilk normality test

p-value: 0.6006749

According to Shapiro-Wilk normality test at 5% of significance, residuals can be considered normal.

Homogeneity of variances test

p-value: 0.5680418

According to the test of bartlett at 5% of significance, residuals can be considered homocedastic.

Tukey's test

| Groups | Treatments | Means    |
|--------|------------|----------|
| a      | Cdot_0.050 | 337.5263 |
| ab     | Cdot_0.020 | 326.4513 |
| ab     | Control    | 297.3587 |
| ab     | Commercial | 290.4412 |
| b      | Cdot_0.20  | 275.235  |

#### LDM

Analysis of Variance Table

|           | DF | SS      | MS       | Fc     | Pr>Fc    |
|-----------|----|---------|----------|--------|----------|
| Treatment | 4  | 0.18092 | 0.045230 | 2.2686 | 0.081463 |
| Residuals | 35 | 0.69780 | 0.019937 |        |          |
| Total     | 39 | 0.87872 |          |        |          |

Shapiro-Wilk normality test

p-value: 0.8287186

According to Shapiro-Wilk normality test at 5% of significance, residuals can be considered normal.

Homogeneity of variances test

p-value: 0.7182087

According to the test of bartlett at 5% of significance, residuals can be considered homocedastic.

Tukey's test

| Groups | Treatments | Means    |
|--------|------------|----------|
| a      | Cdot_0.050 | 0.943375 |
| ab     | Cdot_0.020 | 0.890875 |

|    |            |       |
|----|------------|-------|
| ab | Commercial | 0.824 |
| ab | Cdot_0.20  | 0.793 |
| b  | Control    | 0.757 |

#### SDM

##### Analysis of Variance Table

|           | DF | SS      | MS       | Fc     | Pr>Fc      |
|-----------|----|---------|----------|--------|------------|
| Treatment | 4  | 0.55491 | 0.138727 | 7.4153 | 0.00019521 |
| Residuals | 35 | 0.65479 | 0.018708 |        |            |
| Total     | 39 | 1.20970 |          |        |            |

##### Shapiro-Wilk normality test

p-value: 0.7011448

According to Shapiro-Wilk normality test at 5% of significance, residuals can be considered normal.

##### Homogeneity of variances test

p-value: 0.0600515

According to the test of bartlett at 5% of significance, residuals can be considered homocedastic.

##### Tukey's test

| Groups | Treatments | Means    |
|--------|------------|----------|
| a      | Cdot_0.050 | 1.060875 |
| a      | Cdot_0.020 | 1.0515   |
| ab     | Commercial | 0.902    |
| ab     | Cdot_0.20  | 0.873    |
| b      | Control    | 0.747    |

#### RDM

##### Analysis of Variance Table

|           | DF | SS      | MS        | Fc    | Pr>Fc    |
|-----------|----|---------|-----------|-------|----------|
| Treatment | 4  | 0.08349 | 0.0208725 | 2.782 | 0.041648 |
| Residuals | 35 | 0.26259 | 0.0075026 |       |          |
| Total     | 39 | 0.34608 |           |       |          |

##### Shapiro-Wilk normality test

p-value: 0.9167457

According to Shapiro-Wilk normality test at 5% of significance, residuals can be considered normal.

##### Homogeneity of variances test

p-value: 0.4515067

According to the test of bartlett at 5% of significance, residuals can be considered homocedastic.

##### Tukey's test

| Groups | Treatments | Means    |
|--------|------------|----------|
| a      | Cdot_0.050 | 0.625125 |
| ab     | Commercial | 0.577875 |
| ab     | Cdot_0.020 | 0.55     |
| ab     | Cdot_0.20  | 0.51775  |
| b      | Control    | 0.495    |

#### TDM

##### Analysis of Variance Table

|           | DF | SS     | MS      | Fc     | Pr>Fc      |
|-----------|----|--------|---------|--------|------------|
| Treatment | 4  | 1.9782 | 0.49455 | 8.5086 | 6.6228e-05 |
| Residuals | 35 | 2.0343 | 0.05812 |        |            |
| Total     | 39 | 4.0125 |         |        |            |

##### Shapiro-Wilk normality test

p-value: 0.7154804

According to Shapiro-Wilk normality test at 5% of significance, residuals can be considered normal.

-----  
Homogeneity of variances test

p-value: 0.204624

According to the test of bartlett at 5% of significance, residuals can be considered homocedastic.

-----  
Tukey's test

-----

| Groups | Treatments | Means    |
|--------|------------|----------|
| a      | Cdot_0.050 | 2.629375 |
| ab     | Cdot_0.020 | 2.492375 |
| abc    | Commercial | 2.303875 |
| bc     | Cdot_0.20  | 2.18375  |
| c      | Control    | 1.999    |

-----
